# Supplementary material for: Holm Oak (Quercus ilex subsp. ballota (Desf.) Samp.) Bark Aqueous Ammonia Extract for the Control of Invasive Forest Pathogens
Source: MDPI journal article supplement (doi:10.3390/ijms231911882), 2022-10-06
Supplement: s1 [file s1]

# Holm Oak (*Quercus ilex* subsp. *ballota* (Desf.) Samp.) Bark Aqueous Ammonia Extract for the Control of Invasive Forest Pathogens

E. Sánchez-Hernández, J. Balduque-Gil, J.J. Barriuso-Vargas, J. Casanova-Gascón, V. González-García, J.A. Cuchí-Oterino, B. Lorenzo-Vidal, J. Martín-Gil and P. Martín-Ramos

## SUPPLEMENTARY MATERIAL

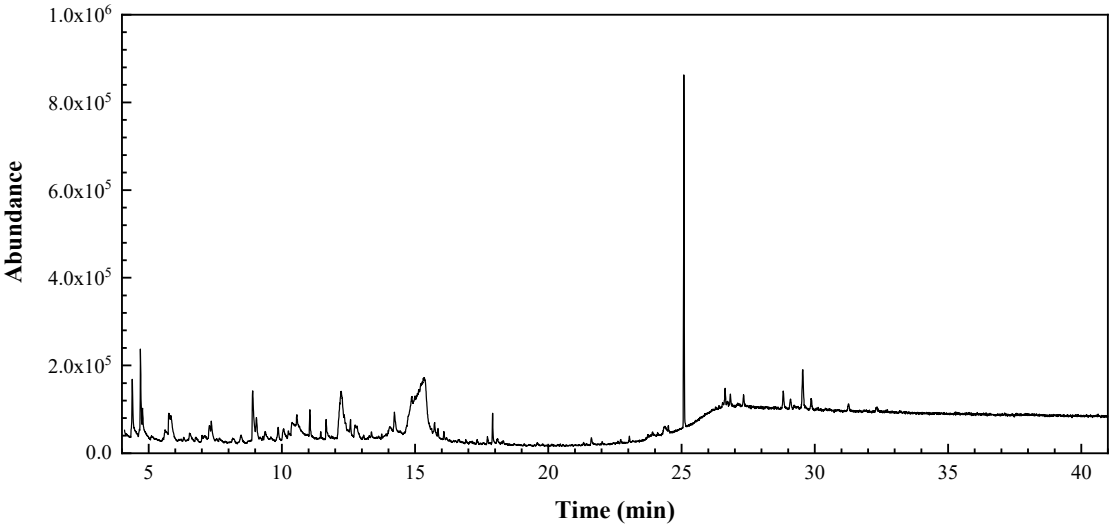

Figure S1. GC–MS chromatogram of *Q. ilex* subsp. *ballota* bark aqueous ammonia extract.

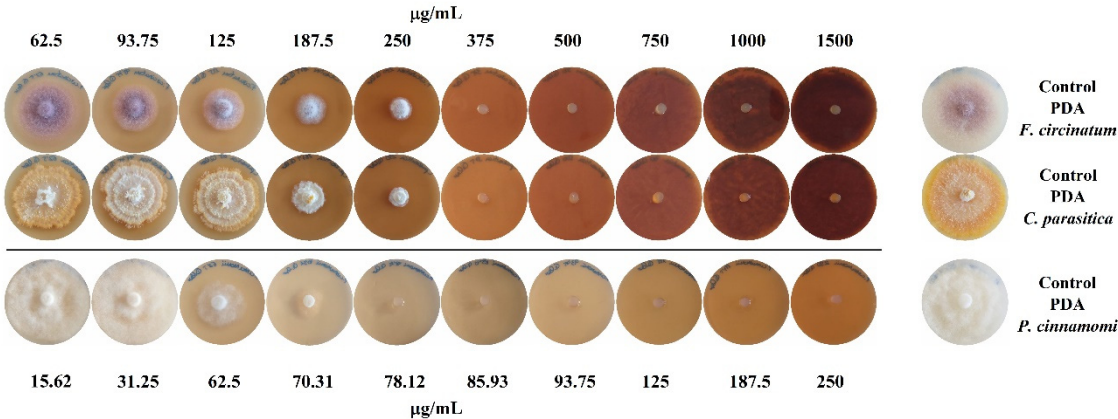

Figure S2. Mycelial growth inhibition of *F. circinatum* (top), *C. parasitica* (center), and *P. cinnamomi* (bottom) upon treatment at different concentrations with *Q. ilex* subsp. *ballota* bark extract. Only one replicate is shown. The control plates (PDA-only medium, without any amendments) are shown on the leftmost column.

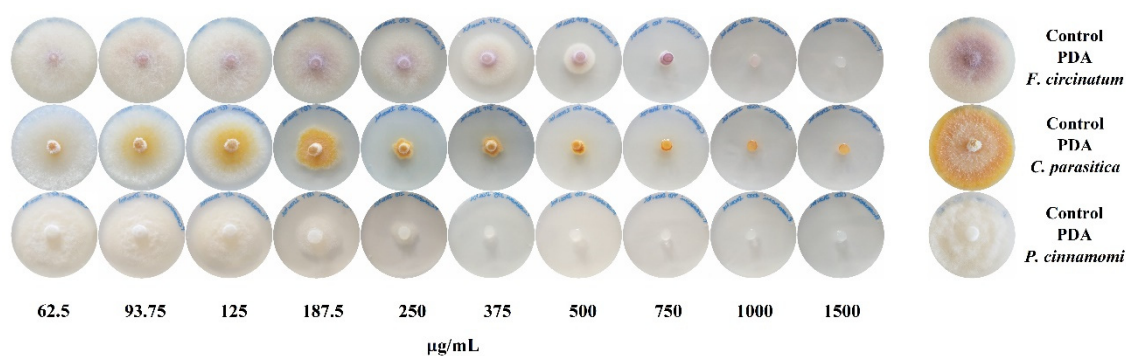

**Figure S3.** Mycelial growth inhibition of *F. circinatum* (top), *C. parasitica* (center), and *P. cinnamomi* (bottom) upon treatment at different concentrations with *myo*-inositol. Only one replicate is shown. The control plates (PDA-only medium, without any amendments) are shown on the leftmost column.

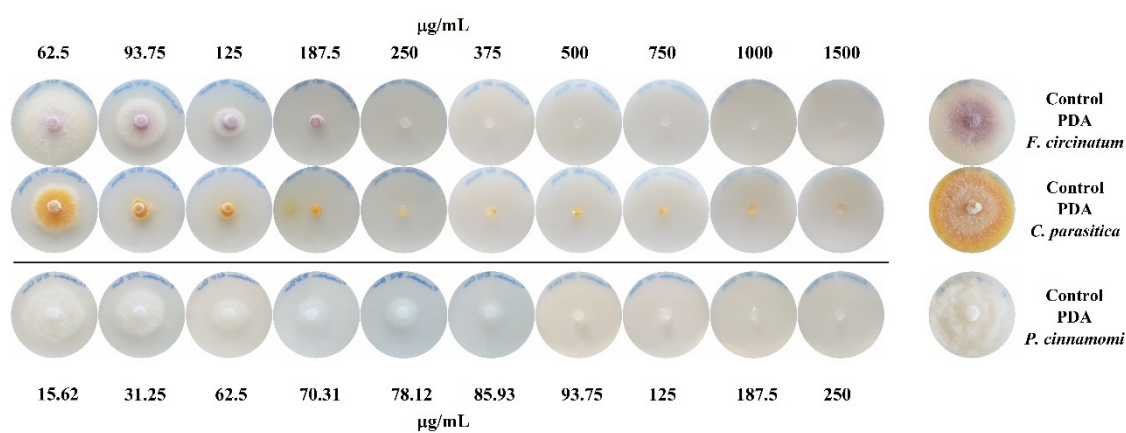

**Figure S4.** Mycelial growth inhibition of *F. circinatum* (top), *C. parasitica* (center), and *P. cinnamomi* (bottom) upon treatment at different concentrations with *trans*-squalene. Only one replicate is shown. The control plates (PDA-only medium, without any amendments) are shown on the leftmost column.

**Table S1.** Minimum inhibitory concentration (MIC) values reported in the literature for *Q. ilex* extracts against microorganisms.

| Collection site            | Extraction procedure                                                          | Microorganisms                                                         | MIC<br>( $\mu\text{g}\cdot\text{mL}^{-1}$ ) | Other activity studied                                                                           | Ref. |
|----------------------------|-------------------------------------------------------------------------------|------------------------------------------------------------------------|---------------------------------------------|--------------------------------------------------------------------------------------------------|------|
| Extremadura<br>(Spain)     | Leaf ethanol or<br>water extract<br>(90%, v/v)                                | <i>Candida boidinii</i> CECT 11153                                     | MIC = 2000                                  | Antioxidant and antihypertensive activity                                                        | [1]  |
|                            |                                                                               | <i>Priceomyces carsonii</i> CECT 10230                                 | MIC = 2000                                  |                                                                                                  |      |
|                            |                                                                               | <i>Kregervanrija fluxuum</i> CECT 12787                                | MIC = 2000                                  |                                                                                                  |      |
|                            |                                                                               | <i>Zygosacharomyces bailii</i> CECT 11043                              | MIC = 2000                                  |                                                                                                  |      |
| Ourika<br>(Morocco)        | Bark ethyl acetate,<br>butanol or water extracts<br>(1.5, 16.05, 16.36%, w/w) | <i>Escherichia coli</i> ATCC 11775                                     | MIC = 256-512                               | n.e.                                                                                             | [2]  |
|                            |                                                                               | <i>Pseudomonas aeruginosa</i> ATCC 27853                               | MIC = 256-512                               |                                                                                                  |      |
|                            |                                                                               | <i>Staphylococcus aureus</i> BCCM 21055                                | MIC = 128-256                               |                                                                                                  |      |
|                            |                                                                               | <i>Bacillus subtilis</i> ATCC 6051                                     | MIC = 128-256                               |                                                                                                  |      |
|                            |                                                                               | <i>Klebsiella pneumoniae</i> ATCC 13883                                | MIC = 512                                   |                                                                                                  |      |
|                            |                                                                               | <i>Salmonella typhimurium</i> ATCC 43971                               | MIC = 256-512                               |                                                                                                  |      |
|                            |                                                                               | <i>Vibrio cholerae</i> ATCC 14033                                      | MIC = 256-512                               |                                                                                                  |      |
|                            |                                                                               | <i>Proteus mirabilis</i> HITM 20                                       | MIC = 256-512                               |                                                                                                  |      |
|                            |                                                                               | <i>S. epidermidis</i> HITM 60                                          | MIC = 128-256                               |                                                                                                  |      |
|                            |                                                                               | <i>S. pyogenes</i> HITM 100                                            | MIC $\geq$ 512                              |                                                                                                  |      |
| Córdoba<br>(Spain)         | Leaf water extract<br>(1:10)                                                  | <i>S. agalactiae</i> HITM 80                                           | MIC $\geq$ 512                              | Effects of simulated gastrointestinal conditions<br>on phenol stability and antioxidant activity | [3]  |
|                            |                                                                               | <i>E. coli</i> CECT 8295                                               | MIC = 2500                                  |                                                                                                  |      |
|                            |                                                                               | <i>Listeria monocytogenes</i> CECT 4032                                | MIC = 5000                                  |                                                                                                  |      |
|                            |                                                                               | <i>S. enterica</i> subsp. <i>enterica</i> serovar Typhimurium CECT 704 | MIC = 2500                                  |                                                                                                  |      |
|                            |                                                                               | <i>S. aureus</i> CECT 5193                                             | MIC = 1000                                  |                                                                                                  |      |
| Marmara region<br>(Turkey) | Leaf methanol extract                                                         | <i>Yersinia enterocolitica</i> CECT 754                                | MIC = 1000                                  | n.e.                                                                                             | [4]  |
|                            |                                                                               | <i>B. atrophaeus</i>                                                   | MIC = 250                                   |                                                                                                  |      |
|                            |                                                                               | <i>B. cereus</i>                                                       | MIC = 250                                   |                                                                                                  |      |
|                            |                                                                               | <i>B. macerans</i>                                                     | MIC = 250                                   |                                                                                                  |      |
|                            |                                                                               | <i>B. pumilus</i>                                                      | MIC = 250                                   |                                                                                                  |      |
|                            |                                                                               | <i>B. sphaericus</i>                                                   | MIC = 250                                   |                                                                                                  |      |
|                            |                                                                               | <i>B. subtilis</i>                                                     | MIC = 125                                   |                                                                                                  |      |
|                            |                                                                               | <i>Brucella abortus</i>                                                | MIC = 250                                   |                                                                                                  |      |

|                  |                                 |                                      |            |                      |     |
|------------------|---------------------------------|--------------------------------------|------------|----------------------|-----|
| Fez<br>(Morocco) | Pollen ethanol extract<br>(50%) | <i>B. melitensis</i>                 | MIC = 250  | Antioxidant activity | [5] |
|                  |                                 | <i>Enterobacter pyrinus</i>          | MIC = 250  |                      |     |
|                  |                                 | <i>E. intermedius</i>                | MIC = 250  |                      |     |
|                  |                                 | <i>E. coli</i>                       | MIC = 250  |                      |     |
|                  |                                 | <i>Neisseria spp.</i>                | MIC = 250  |                      |     |
|                  |                                 | <i>P. fluorescens</i>                | MIC = 250  |                      |     |
|                  |                                 | <i>P. putida</i>                     | MIC = 250  |                      |     |
|                  |                                 | <i>P. syringae</i>                   | MIC = 250  |                      |     |
|                  |                                 | <i>C. albicans</i>                   | MIC = 125  |                      |     |
|                  |                                 | <i>S. aureus</i> 20s1                | MIC = 620  |                      |     |
|                  |                                 | <i>Acinetobacter baumannii</i> 118e1 | MIC = 310  |                      |     |
|                  |                                 | <i>E. cloacae</i> 57e2/n             | MIC = 1250 |                      |     |
|                  |                                 | <i>E. coli</i> 7                     | MIC = 1250 |                      |     |
|                  |                                 | <i>K. pneumoniae</i> 6               | MIC = 2500 |                      |     |
|                  |                                 | <i>P. aeruginosa</i> 8e1             | MIC = 2500 |                      |     |

n.e. = not specified.

**Table S2.** Antimicrobial activity reported in the literature for other natural products rich in *trans*-squalene.

| Natural product                                      | Content (%) | Activity                           | MIC/EC <sub>90</sub><br>( $\mu\text{g}\cdot\text{mL}^{-1}$ ) | Ref.      |
|------------------------------------------------------|-------------|------------------------------------|--------------------------------------------------------------|-----------|
| <i>Q. ilex</i> subsp. <i>ballota</i><br>bark extract | 13          | <i>F. circinatum</i>               | MIC = 250                                                    | This work |
|                                                      |             | <i>C. parasitica</i>               | MIC = 187.5                                                  |           |
|                                                      |             | <i>P. cinnamomi</i>                | MIC = 93.75                                                  |           |
| <i>Ocimum basilicum</i> leaves                       | 1.94        | <i>Bipolaris ellisii</i> CBS 19362 | MIC = 32,000                                                 | [6]       |
|                                                      |             | <i>B. hawaiiensis</i> AUMC 1120    | MIC = 16,000                                                 |           |
|                                                      |             | <i>B. spicifera</i> AUMC 459       | MIC = 32,000                                                 |           |
| <i>Mentha piperita</i>                               | 11.6        | <i>B. cereus</i>                   | MIC = 70                                                     |           |
|                                                      |             | <i>S. aureus</i>                   | MIC = 60                                                     |           |
|                                                      |             | <i>L. monocytogene</i>             | MIC = 90                                                     |           |
|                                                      |             | <i>E. coli</i>                     | MIC = 110                                                    |           |
|                                                      |             | <i>K. pneumonia</i>                | MIC = 100                                                    |           |
|                                                      |             | <i>S. typhi</i>                    | MIC = 120                                                    |           |
|                                                      |             | <i>C. gelbeta</i>                  | MIC = 120                                                    |           |
|                                                      |             | <i>C. tropicalis</i>               | MIC = 95                                                     |           |
|                                                      |             | <i>C. albicans</i>                 | MIC = 80                                                     |           |
|                                                      |             | <i>A. niger</i>                    | MIC = 150                                                    |           |
|                                                      |             | <i>A. fumigatus</i>                | MIC = 65                                                     |           |
|                                                      |             | <i>A. flavus</i>                   | MIC = 110                                                    |           |
|                                                      |             | <i>B. cereus</i>                   | MIC = 110                                                    |           |
|                                                      |             | <i>S. aureus</i>                   | MIC = 100                                                    |           |
|                                                      |             | <i>L. monocytogene</i>             | MIC = 130                                                    |           |
| <i>O. basilicum</i>                                  | 9.2         | <i>E. coli</i>                     | MIC = 140                                                    | [7]       |
|                                                      |             | <i>K. pneumonia</i>                | MIC = 130                                                    |           |
|                                                      |             | <i>S. typhi</i>                    | MIC = 160                                                    |           |
|                                                      |             | <i>C. gelbeta</i>                  | MIC = 140                                                    |           |
|                                                      |             | <i>C. tropicalis</i>               | MIC = 120                                                    |           |
|                                                      |             | <i>C. albicans</i>                 | MIC = 110                                                    |           |
|                                                      |             | <i>A. niger</i>                    | MIC = 170                                                    |           |
|                                                      |             | <i>A. fumigatus</i>                | MIC = 90                                                     |           |
|                                                      |             | <i>A. flavus</i>                   | MIC = 125                                                    |           |
|                                                      |             | <i>B. cereus</i>                   | MIC = 100                                                    |           |
| <i>Lavandula</i>                                     | 7.7         | <i>S. aureus</i>                   | MIC = 90                                                     |           |
|                                                      |             | <i>L. monocytogene</i>             | MIC = 120                                                    |           |
|                                                      |             | <i>E. coli</i>                     | MIC = 130                                                    |           |
|                                                      |             | <i>K. pneumonia</i>                | MIC = 120                                                    |           |
|                                                      |             | <i>S. typhi</i>                    | MIC = 150                                                    |           |
|                                                      |             | <i>C. gelbeta</i>                  | MIC = 130                                                    |           |
|                                                      |             | <i>C. tropicalis</i>               | MIC = 110                                                    |           |
|                                                      |             | <i>C. albicans</i>                 | MIC = 90                                                     |           |
|                                                      |             | <i>A. niger</i>                    | MIC = 160                                                    |           |
|                                                      |             | <i>A. fumigatus</i>                | MIC = 75                                                     |           |
|                                                      |             | <i>A. flavus</i>                   | MIC = 120                                                    |           |
|                                                      |             | <i>B. cereus</i>                   | MIC = 80                                                     |           |
| <i>Cymbopogon citratus</i>                           | 10.2        | <i>S. aureus</i>                   | MIC = 70                                                     |           |
|                                                      |             | <i>L. monocytogene</i>             | MIC = 100                                                    |           |
|                                                      |             | <i>E. coli</i>                     | MIC = 120                                                    |           |
|                                                      |             | <i>K. pneumonia</i>                | MIC = 110                                                    |           |
|                                                      |             |                                    |                                                              |           |

|                                     |      |                                             |                          |     |
|-------------------------------------|------|---------------------------------------------|--------------------------|-----|
|                                     |      | <i>S. typhi</i>                             | MIC = 140                |     |
|                                     |      | <i>C. gelbeta</i>                           | MIC = 110                |     |
|                                     |      | <i>C. tropicalis</i>                        | MIC = 85                 |     |
|                                     |      | <i>C. albicans</i>                          | MIC = 65                 |     |
|                                     |      | <i>A. niger</i>                             | MIC = 130                |     |
|                                     |      | <i>A. fumigatus</i>                         | MIC = 50                 |     |
|                                     |      | <i>A. flavus</i>                            | MIC = 100                |     |
| <i>Acacia auriculiformis</i> leaves | n.e. | <i>Xanthomonas oryzae</i> pv. <i>oryzae</i> | MIC = 3130               | [8] |
| <i>A. mangium</i> leaves            | n.e. | <i>X. oryzae</i> pv. <i>oryzae</i>          | MIC = 1560               |     |
|                                     |      | <i>Diplodia seriata</i>                     | EC <sub>90</sub> = 87.8  |     |
| <i>Rubia tinctorum</i> roots        | 0.35 | <i>Dothiorella viticola</i>                 | EC <sub>90</sub> = 90.2  | [9] |
|                                     |      | <i>Neofusicoccum parvum</i>                 | EC <sub>90</sub> = 184.0 |     |

## References (reference numbers do not match those in the main text)

1. Boy, F.R.; Casquete, R.; Martínez, A.; Córdoba, M.d.G.; Ruíz-Moyano, S.; Benito, M.J. Antioxidant, antihypertensive and antimicrobial properties of phenolic compounds obtained from native plants by different extraction methods. *International Journal of Environmental Research and Public Health* **2021**, *18*, 2475.
2. Berahou, A.; Auhmani, A.; Fdil, N.; Benharref, A.; Jana, M.; Gadhi, C.A. Antibacterial activity of *Quercus ilex* bark's extracts. *J. Ethnopharmacol.* **2007**, *112*, 426-429, doi:10.1016/j.jep.2007.03.032.
3. Sánchez-Gutiérrez, M.; Gómez-García, R.; Carrasco, E.; Bascón-Villegas, I.; Rodríguez, A.; Pintado, M. *Quercus ilex* leaf as a functional ingredient: Polyphenolic profile and antioxidant activity throughout simulated gastrointestinal digestion and antimicrobial activity. *Journal of Functional Foods* **2022**, *91*, doi:10.1016/j.jff.2022.105025.
4. Güllüce, M.; Adıgüzel, A.; Ögütçü, H.; Şengül, M.; Karaman, İ.; Şahin, F. Antimicrobial effects of *Quercus ilex* L. extract. *Phytotherapy Research* **2004**, *18*, 208-211, doi:10.1002/ptr.1419.
5. Bakour, M.; Laaroussi, H.; Ousaaïd, D.; Oumokhtar, B.; Lyoussi, B.; Romeo, F.V. Antioxidant and antibacterial effects of pollen extracts on human multidrug-resistant pathogenic bacteria. *Journal of Food Quality* **2021**, *2021*, 1-11, doi:10.1155/2021/5560182.
6. Elsherbiny, E.A.; Safwat, N.A.; Elaasser, M.M. Fungitoxicity of organic extracts of *Ocimum basilicum* on growth and morphogenesis of *Bipolaris* species (teleomorph *Cochliobolus*). *Journal of Applied Microbiology* **2017**, *123*, 841-852, doi:10.1111/jam.13543.
7. El-Saadony, M.T.; Saad, A.M.; Elakkad, H.A.; El-Tahan, A.M.; Alshahrani, O.A.; Alshilawi, M.S.; El-Sayed, H.; Amin, S.A.; Ahmed, A.I. Flavoring and extending the shelf life of cucumber juice with aroma compounds-rich herbal extracts at 4 °C through controlling chemical and microbial fluctuations. *Saudi Journal of Biological Sciences* **2022**, *29*, 346-354, doi:10.1016/j.sjbs.2021.08.092.
8. Shafiei, S.N.S.; Ahmad, K.; Ikhsan, N.; Ismail, S.I.; Sijam, K. Antibacterial activity of *Acacia* spp . Leaves extracts against *Xanthomonas oryzae* pv . *oryzae* and screening for active phytochemical contents. *IOSR Journal of Agriculture and Veterinary Science* **2017**, *10*, 49-60.
9. Langa-Lomba, N.; Sánchez-Hernández, E.; Buzón-Durán, L.; González-García, V.; Casanova-Gascón, J.; Martín-Gil, J.; Martín-Ramos, P. Activity of anthracenediones and flavoring phenols in hydromethanolic extracts of *Rubia tinctorum* against grapevine phytopathogenic fungi. *Plants* **2021**, *10*, doi:10.3390/plants10081527.
